# Supplementary material
Source: publisher figshare collection journal article supplement (https://tandf.figshare.com/articles/dataset/_/7792118)
Supplement: Supplementary file 1 [file 2]

Supplemental Online Material 2: Details of all the specimens described in this study

(\*In many specimens the lateral edges of the shells are not fully preserved. The original widths of the specimens (Ad. Width) were estimated only when one of the lateral sides is fully preserved.)

*Spiriferella keilhavii* (von Buch, 1846)

| Registration No. | Previously given No. | Locality / section      | Formation         | Bed (Horizon) | Shell/Valve   | Preservation   | Figure           | Measure (mm) |            |        |           |         | Note      |
|------------------|----------------------|-------------------------|-------------------|---------------|---------------|----------------|------------------|--------------|------------|--------|-----------|---------|-----------|
|                  |                      |                         |                   |               |               |                |                  | Width        | Ad. Width* | Length | Thickness | Ad. W:L |           |
| MB.B.10545       |                      | Miseryfjellet, Bjørnøya | Miseryfjellet Fm. |               | Ventral valve | Original shell | Figs 4A, 4C, 10A | 45.5         | 45.5       | 43.5   |           | 1.046   | Lectotype |
| PMO 226.005      |                      | Miseryfjellet, Bjørnøya | Miseryfjellet Fm. |               | Ventral valve | Original shell | Fig. 10E-H       | 28.9         | 28.9       | 22.8   | 10.7      | 1.268   |           |
| PMO 226.006      |                      | Miseryfjellet, Bjørnøya | Miseryfjellet Fm. |               | Ventral valve | Original shell | Fig. 10B         | 30.2         | 30.2       | 29.1   | 10.9      | 1.038   |           |
| PMO 226.007      |                      | Miseryfjellet, Bjørnøya | Miseryfjellet Fm. |               | Ventral valve | Original shell | Fig. 10D         | 41.1         | 42.0       | 34.0   |           | 1.235   |           |
| PMO 226.008      |                      | Miseryfjellet, Bjørnøya | Miseryfjellet Fm. |               | Ventral valve | Original shell | Fig. 10C         | 35.7         | 35.7       | 31.1   |           | 1.148   |           |

*Spiriferella loveni* (Diener, 1903)

| Registration No.    | Previously given No. | Locality / section         | Formation                   | Bed (Horizon) | Shell/Valve     | Preservation   | Figure           | Measure (mm) |            |        |             |         | Note               |
|---------------------|----------------------|----------------------------|-----------------------------|---------------|-----------------|----------------|------------------|--------------|------------|--------|-------------|---------|--------------------|
|                     |                      |                            |                             |               |                 |                |                  | Width        | Ad. Width* | Length | Thickness   | Ad. W:L |                    |
| NHMW 1875/0041/0022 |                      | Lovénberg, Spitsbergen     | Kapp Starostin Fm.          |               | Ventral valve   | Original shell | Figs 4E-G, 12D-E | 27.3         | 30.2       | 23.1   |             | 1.307   | Lectotype          |
| NHMW 2017/0120/0001 |                      | Lovénberg, Spitsbergen     | Kapp Starostin Fm.          |               | Ventral valve   | Original shell | Fig. 12A-C       | 48.8         | 52.0       | 35.7   | 21.0        | 1.457   | Paralectotype      |
| NHMW 2017/0120/0002 |                      | Lovénberg, Spitsbergen     | Kapp Starostin Fm.          |               | Dorsal valve    | Original shell | Figs 4H, 12F-G   |              |            | 21.1   |             |         | Paralectotype      |
| PMO A9883           |                      | Skansbukta(?), Spitsbergen | Kapp Starostin Fm.          |               | Ventral valve   | Original shell | Fig.12K-M        | 23.0         | 23.0       | 22.3   | 10.1        | 1.031   |                    |
| PMO A9884           |                      | Skansbukta(?), Spitsbergen | Kapp Starostin Fm.          |               | Ventral valve   | Original shell | Fig. 12I-J       | 23.8         | 23.8       | 21.8   | 9.2         | 1.092   |                    |
| PMO 227.415         |                      | Tolmodryggen, Spitsbergen  | Kapp Starostin Fm.          |               | Ventral valve   | Original shell | Fig. 12H         | 26.1         |            |        |             |         |                    |
| PMO 226.013         |                      | Miseryfjellet, Bjørnøya    | Miseryfjellet Fm.           |               | Conjoined shell | Original shell | Fig. 12N-P       | 38.4         | 38.4       | 30.5   | 14.5(24.0)  | 1.259   |                    |
| NMV P340298         | DUES-SL042           | F11-001                    | Festningen, Spitsbergen     | F11           | Conjoined shell | Original shell | Figs 11, 12Z-C'  | 45.3         | 45.3       | 38.4   | 14.0 (19.2) | 1.180   | Serially sectioned |
| NMV P340299         | DUES-SL043           | T10bs-001                  | Trygghamna, Spitsbergen     | T10 base      | Conjoined shell | Internal mould | Fig. 13L         | 24.2         | 24.2       | 24.5   |             | 0.988   |                    |
| NMV P340300         | DUES-SL044           | T10bs-002                  | Trygghamna, Spitsbergen     | T10 base      | Conjoined shell | Internal mould | Fig. 13X-Z       | 29.5         | 29.5       | 27.2   | 11.2 (16.8) | 1.085   |                    |
| NMV P340301         | DUES-SL045           | AP7-001                    | Ahlstrandodden, Spitsbergen | A6            | Conjoined shell | Original shell | Fig. 13E'-G'     | 29.5         | 35.0       | 26.7   | 18.0 (25.0) | 1.311   |                    |
| NMV P340302         | DUES-SL046           | SB3-011                    | Skansbukta B, Spitsbergen   | SB9           | Conjoined shell | Original shell | Fig. 13D'        | 38.1         | 38.1       | 38.7   |             | 0.984   |                    |
| NMV P340303         | DUES-SL047           | F4top-001                  | Festningen, Spitsbergen     | F4 top        | Ventral valve   | Original shell |                  | 27.1         | 37.6       |        |             |         |                    |
| NMV P340304         | DUES-SL048           | F7-1-001                   | Festningen, Spitsbergen     | F7 lower      | Ventral valve   | Original shell |                  | 19.6         | 22.0       | 19.9   | 9.4         | 1.106   |                    |
| NMV P340305         | DUES-SL049           | F7-1-002                   | Festningen, Spitsbergen     | F7 lower      | Ventral valve   | Original shell |                  | 21.4         | 21.4       | 18.2   |             | 1.176   |                    |
| NMV P340306         | DUES-SL050           | F7-1-003                   | Festningen, Spitsbergen     | F7 lower      | Ventral valve   | Internal mould |                  | 27.0         |            |        |             |         |                    |
| NMV P340307         | DUES-SL051           | F7-1-004                   | Festningen, Spitsbergen     | F7 lower      | Ventral valve   | Internal mould |                  | 34.2         |            |        |             |         |                    |
| NMV P340308         | DUES-SL052           | F7-1-005                   | Festningen, Spitsbergen     | F7 lower      | Ventral valve   | Internal mould | Fig. 13M         | 27.1         | 27.1       | 22.4   |             | 1.210   |                    |
| NMV P340309         | DUES-SL053           | F7-1-006                   | Festningen, Spitsbergen     | F7 lower      | Ventral valve   | Internal mould |                  | 34.2         | 34.2       |        |             |         |                    |
| NMV P340310         | DUES-SL054           | F7-1-007                   | Festningen, Spitsbergen     | F7 lower      | Ventral valve   | Internal mould |                  | 33.0         |            |        |             |         |                    |
| NMV P340311         | DUES-SL055           | F7-1-008                   | Festningen, Spitsbergen     | F7 lower      | Ventral valve   | External mould |                  | 24.2         | 38.0       |        |             |         |                    |
| NMV P340312         | DUES-SL056           | F7-1-009                   | Festningen, Spitsbergen     | F7 lower      | Ventral valve   | External mould |                  | 20.7         | 23.2       |        |             |         |                    |
| NMV P340313         | DUES-SL057           | F7R-013                    | Festningen, Spitsbergen     | F7 middle     | Ventral valve   | External mould |                  | 20.7         | 20.7       | 18.2   | 8.5         | 1.137   |                    |
| NMV P340314         | DUES-SL058           | F8-041                     | Festningen, Spitsbergen     | F8            | Ventral valve   | Original shell | Fig. 13D-E       | 21.2         | 21.2       | 17.3   | 7.2         | 1.225   |                    |
| NMV P340315         | DUES-SL059           | F8-042                     | Festningen, Spitsbergen     | F8            | Ventral valve   | Original shell | Fig. 12W         | 21.9         | 21.9       | 19.2   | 8.9         | 1.141   |                    |
| NMV P340316         | DUES-SL060           | F8-043                     | Festningen, Spitsbergen     | F8            | Ventral valve   | Original shell | Fig. 12X         | 29.8         | 29.8       | 19.6   | 9.5         | 1.520   |                    |
| NMV P340317         | DUES-SL061           | F8-044                     | Festningen, Spitsbergen     | F8            | Ventral valve   | Original shell |                  | 26.9         | 26.9       | 25.1   | 12.0        | 1.072   |                    |
| NMV P340318         | DUES-SL062           | F8-045                     | Festningen, Spitsbergen     | F8            | Ventral valve   | Original shell |                  | 28.1         | 28.1       | 27.2   | 10.1        | 1.033   |                    |
| NMV P340319         | DUES-SL063           | F8-046                     | Festningen, Spitsbergen     | F8            | Ventral valve   | Original shell |                  | 34.8         | 34.8       | 25.7   | 11.2        | 1.354   |                    |
| NMV P340320         | DUES-SL064           | F8-047                     | Festningen, Spitsbergen     | F8            | Ventral valve   | Original shell | Fig. 12Y         | 39.6         | 39.6       | 33.4   | 10.1        | 1.186   |                    |
| NMV P340321         | DUES-SL065           | F8-048                     | Festningen, Spitsbergen     | F8            | Ventral valve   | Original shell |                  | 46.9         | 46.9       | 34.2   | 14.5        | 1.371   |                    |
| NMV P340322         | DUES-SL066           | F8-049                     | Festningen, Spitsbergen     | F8            | Ventral valve   | Original shell |                  | 48.2         | 51.0       | 40.8   | 14.3        | 1.250   |                    |
| NMV P340323         | DUES-SL067           | F8-050                     | Festningen, Spitsbergen     | F8            | Ventral valve   | Original shell |                  | 35.4         | 35.4       | 39.8   | 15.5        | 0.889   |                    |
| NMV P340324         | DUES-SL068           | F8-051                     | Festningen, Spitsbergen     | F8            | Ventral valve   | Original shell |                  | 51.8         | 56.0       | 42.4   | 15.2        | 1.321   |                    |
| NMV P340325         | DUES-SL069           | F8-052                     | Festningen, Spitsbergen     | F8            | Ventral valve   | Original shell | Fig. 12D'-E'     | 59.9         | 59.9       | 53.2   | 25.0        | 1.126   |                    |
| NMV P340326         | DUES-SL070           | F8-053                     | Festningen, Spitsbergen     | F8            | Ventral valve   | Original shell |                  | 22.8         | 22.8       | 22.1   | 7.4         | 1.032   |                    |
| NMV P340327         | DUES-SL071           | F8-054                     | Festningen, Spitsbergen     | F8            | Ventral valve   | Original shell |                  | 25.8         | 25.8       | 24.2   | 8.2         | 1.066   |                    |

|             |            |           |                         |                    |          |               |                |      |      |      |      |       |
|-------------|------------|-----------|-------------------------|--------------------|----------|---------------|----------------|------|------|------|------|-------|
| NMV P340328 | DUES-SL072 | F8-055    | Festningen, Spitsbergen | Kapp Starostin Fm. | F8       | Ventral valve | Original shell | 27.6 | 27.6 | 21.8 | 10.1 | 1.266 |
| NMV P340329 | DUES-SL073 | F8-056    | Festningen, Spitsbergen | Kapp Starostin Fm. | F8       | Ventral valve | Original shell | 24.5 | 24.5 | 19.0 | 7.8  | 1.289 |
| NMV P340330 | DUES-SL074 | F8-057    | Festningen, Spitsbergen | Kapp Starostin Fm. | F8       | Ventral valve | Original shell | 27.9 | 27.9 | 24.7 | 10.2 | 1.130 |
| NMV P340331 | DUES-SL075 | F8-058    | Festningen, Spitsbergen | Kapp Starostin Fm. | F8       | Ventral valve | Original shell | 27.4 | 27.4 | 27.6 | 10.7 | 0.993 |
| NMV P340332 | DUES-SL076 | F8-059    | Festningen, Spitsbergen | Kapp Starostin Fm. | F8       | Ventral valve | Original shell | 23.6 | 23.6 | 17.5 | 8.2  | 1.349 |
| NMV P340333 | DUES-SL077 | F8-060    | Festningen, Spitsbergen | Kapp Starostin Fm. | F8       | Ventral valve | Original shell | 28.4 | 28.4 | 23.1 | 10.0 | 1.229 |
| NMV P340334 | DUES-SL078 | F8-061    | Festningen, Spitsbergen | Kapp Starostin Fm. | F8       | Ventral valve | Original shell | 30.8 | 30.8 | 28.2 | 14.6 | 1.092 |
| NMV P340335 | DUES-SL079 | F8-062    | Festningen, Spitsbergen | Kapp Starostin Fm. | F8       | Ventral valve | Original shell | 31.4 | 35.0 | 29.1 | 11.5 | 1.203 |
| NMV P340336 | DUES-SL080 | F8-063    | Festningen, Spitsbergen | Kapp Starostin Fm. | F8       | Ventral valve | Original shell | 25.9 | 28.0 | 23.1 | 11.7 | 1.212 |
| NMV P340337 | DUES-SL081 | F8-064    | Festningen, Spitsbergen | Kapp Starostin Fm. | F8       | Ventral valve | Original shell | 30.2 | 32.0 | 28.7 | 16.5 | 1.115 |
| NMV P340338 | DUES-SL082 | F8-065    | Festningen, Spitsbergen | Kapp Starostin Fm. | F8       | Ventral valve | Original shell | 26.1 | 32.0 | 28.0 | 12.3 | 1.143 |
| NMV P340339 | DUES-SL083 | F8-066    | Festningen, Spitsbergen | Kapp Starostin Fm. | F8       | Ventral valve | Original shell | 40.4 | 40.4 | 30.7 | 15.5 | 1.316 |
| NMV P340340 | DUES-SL084 | F8-067    | Festningen, Spitsbergen | Kapp Starostin Fm. | F8       | Ventral valve | Original shell | 48.2 | 48.2 | 46.2 | 16.7 | 1.043 |
| NMV P340341 | DUES-SL085 | F8-068    | Festningen, Spitsbergen | Kapp Starostin Fm. | F8       | Ventral valve | Original shell | 46.5 | 46.5 | 44.4 | 17.1 | 1.047 |
| NMV P340342 | DUES-SL086 | F8-069    | Festningen, Spitsbergen | Kapp Starostin Fm. | F8       | Ventral valve | Original shell | 47.8 | 47.8 | 42.7 | 16.6 | 1.119 |
| NMV P340343 | DUES-SL087 | F8-070    | Festningen, Spitsbergen | Kapp Starostin Fm. | F8       | Ventral valve | Original shell | 35.2 | 35.2 | 34.1 | 17.1 | 1.032 |
| NMV P340344 | DUES-SL088 | F8-071    | Festningen, Spitsbergen | Kapp Starostin Fm. | F8       | Ventral valve | Original shell | 40.0 | 40.0 | 35.5 | 18.0 | 1.127 |
| NMV P340345 | DUES-SL089 | F8-072    | Festningen, Spitsbergen | Kapp Starostin Fm. | F8       | Ventral valve | Original shell | 48.4 | 48.4 | 38.5 | 13.7 | 1.257 |
| NMV P340346 | DUES-SL090 | F8-073    | Festningen, Spitsbergen | Kapp Starostin Fm. | F8       | Ventral valve | Original shell | 46.5 | 46.5 | 40.7 | 15.5 | 1.143 |
| NMV P340347 | DUES-SL091 | F8-074    | Festningen, Spitsbergen | Kapp Starostin Fm. | F8       | Ventral valve | Original shell | 45.0 | 45.0 | 38.2 | 13.6 | 1.178 |
| NMV P340348 | DUES-SL092 | F8-075    | Festningen, Spitsbergen | Kapp Starostin Fm. | F8       | Ventral valve | Original shell | 42.6 | 42.6 | 37.4 | 15.2 | 1.139 |
| NMV P340349 | DUES-SL093 | F8-076    | Festningen, Spitsbergen | Kapp Starostin Fm. | F8       | Ventral valve | Original shell | 47.7 | 47.7 | 40.4 | 18.0 | 1.181 |
| NMV P340350 | DUES-SL094 | F8-077    | Festningen, Spitsbergen | Kapp Starostin Fm. | F8       | Ventral valve | Original shell | 37.8 | 37.8 | 35.5 | 15.2 | 1.065 |
| NMV P340351 | DUES-SL095 | F8-078    | Festningen, Spitsbergen | Kapp Starostin Fm. | F8       | Ventral valve | Original shell | 45.5 | 53.0 | 35.0 | 14.5 | 1.514 |
| NMV P340352 | DUES-SL096 | F8-079    | Festningen, Spitsbergen | Kapp Starostin Fm. | F8       | Ventral valve | Original shell | 35.2 | 35.2 | 32.3 | 11.7 | 1.090 |
| NMV P340353 | DUES-SL097 | F8-080    | Festningen, Spitsbergen | Kapp Starostin Fm. | F8       | Ventral valve | Original shell | 45.0 | 47.0 | 35.0 | 12.0 | 1.343 |
| NMV P340354 | DUES-SL098 | F8-081    | Festningen, Spitsbergen | Kapp Starostin Fm. | F8       | Ventral valve | Original shell | 43.0 | 47.0 | 32.5 | 15.5 | 1.446 |
| NMV P340355 | DUES-SL099 | F8-082    | Festningen, Spitsbergen | Kapp Starostin Fm. | F8       | Ventral valve | Original shell | 38.0 | 38.0 | 29.1 | 12.1 | 1.306 |
| NMV P340356 | DUES-SL100 | F8-083    | Festningen, Spitsbergen | Kapp Starostin Fm. | F8       | Ventral valve | Original shell | 29.1 | 29.1 | 27.5 | 12.8 | 1.058 |
| NMV P340357 | DUES-SL101 | F8-084    | Festningen, Spitsbergen | Kapp Starostin Fm. | F8       | Ventral valve | Original shell | 43.6 | 43.6 | 39.1 | 19.0 | 1.115 |
| NMV P340358 | DUES-SL102 | F8-085    | Festningen, Spitsbergen | Kapp Starostin Fm. | F8       | Ventral valve | Original shell | 38.2 | 38.2 | 33.3 | 13.3 | 1.147 |
| NMV P340359 | DUES-SL103 | F8-086    | Festningen, Spitsbergen | Kapp Starostin Fm. | F8       | Ventral valve | Original shell | 53.3 | 53.3 | 47.6 | 17.4 | 1.120 |
| NMV P340360 | DUES-SL104 | F8-087    | Festningen, Spitsbergen | Kapp Starostin Fm. | F8       | Ventral valve | Original shell | 36.3 | 36.3 | 37.4 | 17.1 | 0.971 |
| NMV P340361 | DUES-SL105 | F8-088    | Festningen, Spitsbergen | Kapp Starostin Fm. | F8       | Ventral valve | Original shell | 60.2 | 60.2 | 49.6 | 24.0 | 1.214 |
| NMV P340362 | DUES-SL106 | F8-089    | Festningen, Spitsbergen | Kapp Starostin Fm. | F8       | Ventral valve | Original shell | 51.5 | 51.5 | 35.6 | 14.5 | 1.447 |
| NMV P340363 | DUES-SL107 | F8-090    | Festningen, Spitsbergen | Kapp Starostin Fm. | F8       | Ventral valve | Original shell | 41.3 | 41.3 | 34.2 | 15.1 | 1.208 |
| NMV P340364 | DUES-SL108 | F8-091    | Festningen, Spitsbergen | Kapp Starostin Fm. | F8       | Ventral valve | Original shell | 53.9 | 53.9 | 51.7 | 17.8 | 1.043 |
| NMV P340365 | DUES-SL109 | F8-092    | Festningen, Spitsbergen | Kapp Starostin Fm. | F8       | Ventral valve | Original shell | 46.3 | 49.0 | 37.0 | 15.5 | 1.324 |
| NMV P340366 | DUES-SL110 | F8-093    | Festningen, Spitsbergen | Kapp Starostin Fm. | F8       | Ventral valve | Original shell | 44.4 | 44.4 | 34.7 | 14.1 | 1.280 |
| NMV P340367 | DUES-SL111 | F8-094    | Festningen, Spitsbergen | Kapp Starostin Fm. | F8       | Ventral valve | Original shell | 35.2 | 35.2 | 33.4 | 12.0 | 1.054 |
| NMV P340368 | DUES-SL112 | F9bs-006  | Festningen, Spitsbergen | Kapp Starostin Fm. | F9 base  | Ventral valve | Original shell | 42.2 | 42.2 | 32.0 |      | 1.319 |
| NMV P340369 | DUES-SL113 | F9bs-007  | Festningen, Spitsbergen | Kapp Starostin Fm. | F9 base  | Ventral valve | Original shell | 29.2 | 33.0 | 24.9 |      | 1.325 |
| NMV P340370 | DUES-SL114 | F9bs-008  | Festningen, Spitsbergen | Kapp Starostin Fm. | F9 base  | Ventral valve | Original shell | 31.2 | 31.2 | 22.8 |      | 1.368 |
| NMV P340371 | DUES-SL115 | F9-001    | Festningen, Spitsbergen | Kapp Starostin Fm. | F9       | Ventral valve | Original shell | 32.0 |      | 38.0 |      |       |
| NMV P340372 | DUES-SL116 | T10bs-003 | Trygghamna, Spitsbergen | Kapp Starostin Fm. | T10 base | Ventral valve | Internal mould | 36.5 |      |      |      |       |
| NMV P340373 | DUES-SL117 | F11-002   | Festningen, Spitsbergen | Kapp Starostin Fm. | F11      | Ventral valve | Original shell | 39.0 | 44.0 | 39.0 |      | 1.128 |
| NMV P340374 | DUES-SL118 | F11-003   | Festningen, Spitsbergen | Kapp Starostin Fm. | F11      | Ventral valve | Original shell | 49.0 | 64.0 |      |      |       |
| NMV P340375 | DUES-SL119 | F11-004   | Festningen, Spitsbergen | Kapp Starostin Fm. | F11      | Ventral valve | Original shell |      |      | 51.2 |      |       |
| NMV P340376 | DUES-SL120 | F11-005   | Festningen, Spitsbergen | Kapp Starostin Fm. | F11      | Ventral valve | Original shell |      |      | 49.5 |      |       |
| NMV P340377 | DUES-SL121 | T2-001    | Trygghamna, Spitsbergen | Vøringen Mb.       | T2       | Ventral valve | Original shell | 24.0 | 24.0 | 25.1 | 9.8  | 0.956 |
| NMV P340378 | DUES-SL122 | T2-002    | Trygghamna, Spitsbergen | Vøringen Mb.       | T2       | Ventral valve | Original shell | 23.5 | 26.0 | 23.7 | 12.0 | 1.097 |
| NMV P340379 | DUES-SL123 | T8-005    | Trygghamna, Spitsbergen | Kapp Starostin Fm. | T8       | Ventral valve | Original shell | 22.0 |      |      |      |       |

Fig. 13U

|             |            |         |                             |                    |          |               |                |              |      |      |      |      |       |
|-------------|------------|---------|-----------------------------|--------------------|----------|---------------|----------------|--------------|------|------|------|------|-------|
| NMV P340380 | DUES-SL124 | T8-006  | Trygghamna, Spitsbergen     | Kapp Starostin Fm. | T8       | Ventral valve | Original shell |              | 24.0 |      |      |      |       |
| NMV P340381 | DUES-SL125 | T8-007  | Trygghamna, Spitsbergen     | Kapp Starostin Fm. | T8       | Ventral valve | Original shell |              | 27.8 | 27.8 | 25.0 | 12.1 | 1.112 |
| NMV P340382 | DUES-SL126 | T8-008  | Trygghamna, Spitsbergen     | Kapp Starostin Fm. | T8       | Ventral valve | Original shell |              | 35.6 | 35.6 | 34.1 |      | 1.044 |
| NMV P340383 | DUES-SL127 | T8-010  | Trygghamna, Spitsbergen     | Kapp Starostin Fm. | T8       | Ventral valve | Original shell |              | 42.0 | 42.0 | 31.0 | 13.4 | 1.355 |
| NMV P340384 | DUES-SL128 | T8-011  | Trygghamna, Spitsbergen     | Kapp Starostin Fm. | T8       | Ventral valve | Internal mould |              | 50.1 | 53.0 | 39.0 |      | 1.359 |
| NMV P340385 | DUES-SL129 | AP2-002 | Ahlstrandodden, Spitsbergen | Kapp Starostin Fm. | A3 lower | Ventral valve | Internal mould |              | 33.0 |      | 26.0 |      |       |
| NMV P340386 | DUES-SL130 | AP6-009 | Ahlstrandodden, Spitsbergen | Kapp Starostin Fm. | A5       | Ventral valve | Original shell |              | 21.9 | 21.9 | 25.4 | 10.3 | 0.862 |
| NMV P340387 | DUES-SL131 | AP6-010 | Ahlstrandodden, Spitsbergen | Kapp Starostin Fm. | A5       | Ventral valve | Original shell |              | 28.7 | 28.7 | 28.5 | 13.0 | 1.007 |
| NMV P340388 | DUES-SL132 | AP6-011 | Ahlstrandodden, Spitsbergen | Kapp Starostin Fm. | A5       | Ventral valve | Original shell |              | 28.9 | 28.9 | 28.7 | 12.1 | 1.007 |
| NMV P340389 | DUES-SL133 | AP6-012 | Ahlstrandodden, Spitsbergen | Kapp Starostin Fm. | A5       | Ventral valve | Original shell |              | 27.0 | 27.0 | 26.5 | 13.0 | 1.019 |
| NMV P340390 | DUES-SL134 | AP6-013 | Ahlstrandodden, Spitsbergen | Kapp Starostin Fm. | A5       | Ventral valve | Original shell |              | 26.7 | 26.7 | 28.0 | 14.0 | 0.954 |
| NMV P340391 | DUES-SL135 | AP7-002 | Ahlstrandodden, Spitsbergen | Kapp Starostin Fm. | A6       | Ventral valve | Original shell |              | 23.5 | 23.5 |      |      |       |
| NMV P340392 | DUES-SL136 | AP7-003 | Ahlstrandodden, Spitsbergen | Kapp Starostin Fm. | A6       | Ventral valve | Original shell |              | 28.4 | 28.4 | 21.9 | 11.6 | 1.297 |
| NMV P340393 | DUES-SL137 | AP7-004 | Ahlstrandodden, Spitsbergen | Kapp Starostin Fm. | A6       | Ventral valve | Internal mould |              | 33.8 | 33.8 | 29.0 |      | 1.166 |
| NMV P340394 | DUES-SL138 | W-f-003 | Idodalen, Spitsbergen       | Kapp Starostin Fm. | lf       | Ventral valve | Original shell |              | 19.0 | 19.0 | 17.5 |      | 1.086 |
| NMV P340395 | DUES-SL139 | W-f-004 | Idodalen, Spitsbergen       | Kapp Starostin Fm. | lf       | Ventral valve | Original shell |              | 21.2 | 21.2 | 20.0 | 11.0 | 1.060 |
| NMV P340396 | DUES-SL140 | W-f-005 | Idodalen, Spitsbergen       | Kapp Starostin Fm. | lf       | Ventral valve | Original shell |              | 25.0 | 25.0 | 22.5 |      | 1.111 |
| NMV P340397 | DUES-SL141 | W-i-001 | Idodalen, Spitsbergen       | Kapp Starostin Fm. | li       | Ventral valve | Original shell |              | 41.0 |      |      |      |       |
| NMV P340398 | DUES-SL142 | SA7-001 | Skansbukta A, Spitsbergen   | Kapp Starostin Fm. | SA7      | Ventral valve | Original shell |              | 22.1 | 22.1 | 20.3 | 9.8  | 1.089 |
| NMV P340399 | DUES-SL143 | SB3-012 | Skansbukta B, Spitsbergen   | Kapp Starostin Fm. | SB9      | Ventral valve | Original shell | Fig. 13A-C   | 17.8 | 17.8 | 15.9 | 7.1  | 1.119 |
| NMV P340400 | DUES-SL144 | SB3-013 | Skansbukta B, Spitsbergen   | Kapp Starostin Fm. | SB9      | Ventral valve | Original shell |              | 17.2 | 17.2 | 17.8 | 8.9  | 0.966 |
| NMV P340401 | DUES-SL145 | SB3-014 | Skansbukta B, Spitsbergen   | Kapp Starostin Fm. | SB9      | Ventral valve | Original shell |              | 19.4 | 19.4 | 18.1 | 8.3  | 1.072 |
| NMV P340402 | DUES-SL146 | SB3-015 | Skansbukta B, Spitsbergen   | Kapp Starostin Fm. | SB9      | Ventral valve | Original shell |              | 17.9 | 17.9 | 18.2 |      | 0.984 |
| NMV P340403 | DUES-SL147 | SB3-016 | Skansbukta B, Spitsbergen   | Kapp Starostin Fm. | SB9      | Ventral valve | Original shell |              | 20.1 | 20.1 | 18.9 | 9.2  | 1.063 |
| NMV P340404 | DUES-SL148 | SB3-017 | Skansbukta B, Spitsbergen   | Kapp Starostin Fm. | SB9      | Ventral valve | Original shell |              | 19.0 | 19.2 | 19.8 | 9.0  | 0.970 |
| NMV P340405 | DUES-SL149 | SB3-018 | Skansbukta B, Spitsbergen   | Kapp Starostin Fm. | SB9      | Ventral valve | Original shell |              | 18.9 | 19.3 | 20.5 | 9.9  | 0.941 |
| NMV P340406 | DUES-SL150 | SB3-019 | Skansbukta B, Spitsbergen   | Kapp Starostin Fm. | SB9      | Ventral valve | Original shell |              | 22.5 | 22.5 | 22.2 | 10.8 | 1.014 |
| NMV P340407 | DUES-SL151 | SB3-020 | Skansbukta B, Spitsbergen   | Kapp Starostin Fm. | SB9      | Ventral valve | Original shell |              | 21.7 | 21.7 | 20.1 | 11.0 | 1.080 |
| NMV P340408 | DUES-SL152 | SB3-021 | Skansbukta B, Spitsbergen   | Kapp Starostin Fm. | SB9      | Ventral valve | Original shell | Fig. 13H-I   | 22.0 | 24.0 | 21.1 | 9.2  | 1.137 |
| NMV P340409 | DUES-SL153 | SB3-022 | Skansbukta B, Spitsbergen   | Kapp Starostin Fm. | SB9      | Ventral valve | Original shell | Fig. 13F-G   | 19.7 | 19.7 | 23.5 | 10.3 | 0.838 |
| NMV P340410 | DUES-SL154 | SB3-023 | Skansbukta B, Spitsbergen   | Kapp Starostin Fm. | SB9      | Ventral valve | Original shell |              | 22.3 | 22.3 | 25.5 | 12.1 | 0.875 |
| NMV P340411 | DUES-SL155 | SB3-024 | Skansbukta B, Spitsbergen   | Kapp Starostin Fm. | SB9      | Ventral valve | Original shell |              | 26.2 | 26.2 | 25.9 | 10.7 | 1.012 |
| NMV P340412 | DUES-SL156 | SB3-025 | Skansbukta B, Spitsbergen   | Kapp Starostin Fm. | SB9      | Ventral valve | Original shell | Fig. 13N-P   | 26.4 | 26.4 |      | 12.7 |       |
| NMV P340413 | DUES-SL157 | SB3-026 | Skansbukta B, Spitsbergen   | Kapp Starostin Fm. | SB9      | Ventral valve | Original shell |              | 24.9 | 24.9 | 26.3 | 11.9 | 0.947 |
| NMV P340414 | DUES-SL158 | SB3-027 | Skansbukta B, Spitsbergen   | Kapp Starostin Fm. | SB9      | Ventral valve | Original shell |              | 24.7 | 24.7 | 28.2 | 11.0 | 0.876 |
| NMV P340415 | DUES-SL159 | SB3-028 | Skansbukta B, Spitsbergen   | Kapp Starostin Fm. | SB9      | Ventral valve | Original shell |              | 27.0 | 27.0 | 28.2 | 14.6 | 0.957 |
| NMV P340416 | DUES-SL160 | SB3-029 | Skansbukta B, Spitsbergen   | Kapp Starostin Fm. | SB9      | Ventral valve | Original shell | Fig. 13S-T   | 36.2 | 36.2 | 34.0 | 13.5 | 1.065 |
| NMV P340417 | DUES-SL161 | SB3-030 | Skansbukta B, Spitsbergen   | Kapp Starostin Fm. | SB9      | Ventral valve | Original shell |              | 25.9 | 29.0 | 32.4 | 13.9 | 0.895 |
| NMV P340418 | DUES-SL162 | SB3-031 | Skansbukta B, Spitsbergen   | Kapp Starostin Fm. | SB9      | Ventral valve | Original shell |              | 30.5 | 33.0 | 34.1 | 14.0 | 0.968 |
| NMV P340419 | DUES-SL163 | SB3-032 | Skansbukta B, Spitsbergen   | Kapp Starostin Fm. | SB9      | Ventral valve | Original shell | Fig. 13Q-R   | 33.8 | 33.8 | 30.9 | 14.2 | 1.094 |
| NMV P340420 | DUES-SL164 | SB3-033 | Skansbukta B, Spitsbergen   | Kapp Starostin Fm. | SB9      | Ventral valve | Original shell | Fig. 13A'-B' | 28.6 | 28.6 | 31.2 | 14.1 | 0.917 |
| NMV P340421 | DUES-SL165 | SB3-034 | Skansbukta B, Spitsbergen   | Kapp Starostin Fm. | SB9      | Ventral valve | Original shell |              | 29.1 | 29.1 | 33.6 | 15.1 | 0.866 |
| NMV P340422 | DUES-SL166 | SB3-035 | Skansbukta B, Spitsbergen   | Kapp Starostin Fm. | SB9      | Ventral valve | Original shell |              | 32.2 | 32.2 | 34.9 | 13.9 | 0.923 |
| NMV P340423 | DUES-SL167 | SB3-036 | Skansbukta B, Spitsbergen   | Kapp Starostin Fm. | SB9      | Ventral valve | Original shell |              | 35.4 | 35.4 | 34.7 | 16.5 | 1.020 |
| NMV P340424 | DUES-SL168 | SB3-037 | Skansbukta B, Spitsbergen   | Kapp Starostin Fm. | SB9      | Ventral valve | Original shell |              | 29.5 | 35.0 | 38.0 | 17.2 | 0.921 |
| NMV P340425 | DUES-SL169 | SB3-038 | Skansbukta B, Spitsbergen   | Kapp Starostin Fm. | SB9      | Ventral valve | Original shell |              | 34.6 | 34.6 | 36.7 | 15.4 | 0.943 |
| NMV P340426 | DUES-SL170 | SB3-039 | Skansbukta B, Spitsbergen   | Kapp Starostin Fm. | SB9      | Ventral valve | Original shell |              | 34.2 | 34.2 | 37.8 | 18.0 | 0.905 |
| NMV P340427 | DUES-SL171 | SB3-040 | Skansbukta B, Spitsbergen   | Kapp Starostin Fm. | SB9      | Ventral valve | Original shell |              | 31.0 | 34.0 | 33.7 | 17.3 | 1.009 |
| NMV P340428 | DUES-SL172 | SB3-041 | Skansbukta B, Spitsbergen   | Kapp Starostin Fm. | SB9      | Ventral valve | Original shell |              | 39.2 | 39.2 | 42.4 | 16.7 | 0.925 |
| NMV P340429 | DUES-SL173 | SB3-042 | Skansbukta B, Spitsbergen   | Kapp Starostin Fm. | SB9      | Ventral valve | Original shell | Fig. 13V-W   | 38.9 | 38.9 | 42.2 | 19.0 | 0.922 |
| NMV P340430 | DUES-SL174 | SB3-043 | Skansbukta B, Spitsbergen   | Kapp Starostin Fm. | SB9      | Ventral valve | Original shell |              | 39.1 | 39.1 | 45.0 | 17.2 | 0.869 |
| NMV P340431 | DUES-SL175 | SB3-044 | Skansbukta B, Spitsbergen   | Kapp Starostin Fm. | SB9      | Ventral valve | Original shell |              | 31.4 | 40.0 | 43.0 | 19.0 | 0.930 |

|             |                   |            |                               |                    |           |               |                |              |      |      |      |      |       |
|-------------|-------------------|------------|-------------------------------|--------------------|-----------|---------------|----------------|--------------|------|------|------|------|-------|
| NMV P340432 | DUES-SL176        | F7top-001  | Festningen, Spitsbergen       | Kapp Starostin Fm. | F7 top    | Dorsal valve  | Original shell |              | 28.0 | 34.0 | 21.7 |      | 1.567 |
| NMV P340433 | DUES-SL177        | F7top-002  | Festningen, Spitsbergen       | Kapp Starostin Fm. | F7 top    | Dorsal valve  | Internal mould |              | 37.2 | 37.2 | 27.1 |      | 1.373 |
| NMV P340434 | DUES-SL178        | F8-095     | Festningen, Spitsbergen       | Kapp Starostin Fm. | F8        | Dorsal valve  | Original shell |              | 41.2 | 41.2 | 22.6 | 7.0  | 1.823 |
| NMV P340435 | DUES-SL179        | F8-096     | Festningen, Spitsbergen       | Kapp Starostin Fm. | F8        | Dorsal valve  | Original shell | Fig. 13H'    | 38.4 | 38.4 | 28.1 | 8.4  | 1.367 |
| NMV P340436 | DUES-SL180        | F8-097     | Festningen, Spitsbergen       | Kapp Starostin Fm. | F8        | Dorsal valve  | Original shell | Fig. 13J'-K' | 46.5 | 46.5 | 31.1 | 11.4 | 1.495 |
| NMV P340437 | DUES-SL181        | F8-098     | Festningen, Spitsbergen       | Kapp Starostin Fm. | F8        | Dorsal valve  | Original shell |              | 50.0 | 50.0 | 29.5 | 8.1  | 1.695 |
| NMV P340438 | DUES-SL182        | F8-099     | Festningen, Spitsbergen       | Kapp Starostin Fm. | F8        | Dorsal valve  | Original shell |              | 32.5 | 32.5 | 21.7 | 5.0  | 1.498 |
| NMV P340439 | DUES-SL183        | F8-100     | Festningen, Spitsbergen       | Kapp Starostin Fm. | F8        | Dorsal valve  | Original shell |              | 56.0 | 56.0 | 37.4 | 9.0  | 1.497 |
| NMV P340440 | DUES-SL184        | F8-101     | Festningen, Spitsbergen       | Kapp Starostin Fm. | F8        | Dorsal valve  | Original shell |              | 33.0 | 39.0 | 25.5 | 7.8  | 1.529 |
| NMV P340441 | DUES-SL185        | F8-102     | Festningen, Spitsbergen       | Kapp Starostin Fm. | F8        | Dorsal valve  | Original shell |              | 53.0 | 53.0 | 40.6 | 13.8 | 1.305 |
| NMV P340442 | DUES-SL186        | F8-103     | Festningen, Spitsbergen       | Kapp Starostin Fm. | F8        | Dorsal valve  | Original shell |              | 52.0 | 52.0 | 39.0 | 11.0 | 1.333 |
| NMV P340443 | DUES-SL187        | F8-104     | Festningen, Spitsbergen       | Kapp Starostin Fm. | F8        | Dorsal valve  | Original shell |              | 48.7 | 48.7 |      | 7.4  |       |
| NMV P340444 | DUES-SL188        | F8-105     | Festningen, Spitsbergen       | Kapp Starostin Fm. | F8        | Dorsal valve  | Original shell |              | 34.0 | 34.0 | 23.4 | 7.2  | 1.453 |
| NMV P340445 | DUES-SL189        | F8-106     | Festningen, Spitsbergen       | Kapp Starostin Fm. | F8        | Dorsal valve  | Original shell |              | 41.0 | 45.0 | 32.4 | 7.8  | 1.389 |
| NMV P340446 | DUES-SL190        | F8-107     | Festningen, Spitsbergen       | Kapp Starostin Fm. | F8        | Dorsal valve  | Original shell |              | 35.0 |      |      |      |       |
| NMV P340447 | DUES-SL191        | F8-108     | Festningen, Spitsbergen       | Kapp Starostin Fm. | F8        | Dorsal valve  | Original shell |              |      |      | 39.0 | 10.0 |       |
| NMV P340448 | DUES-SL192        | F9bs-009   | Festningen, Spitsbergen       | Kapp Starostin Fm. | F9 base   | Dorsal valve  | Original shell | Fig. 13I'    | 42.6 | 42.6 | 32.5 |      | 1.311 |
| NMV P340449 | DUES-SL193        | F10-002    | Festningen, Spitsbergen       | Kapp Starostin Fm. | F10       | Dorsal valve  | Original shell |              |      |      | 26.0 |      |       |
| NMV P340450 | DUES-SL194        | F10-003    | Festningen, Spitsbergen       | Kapp Starostin Fm. | F10       | Dorsal valve  | Original shell |              | 33.0 | 33.0 |      |      |       |
| NMV P340451 | DUES-SL195        | T8-009     | Trygghamna, Spitsbergen       | Kapp Starostin Fm. | T8        | Dorsal valve  | Original shell |              | 38.7 | 38.7 | 26.8 | 9.5  | 1.444 |
| NMV P340452 | DUES-SL196        | T10top-001 | Trygghamna, Spitsbergen       | Kapp Starostin Fm. | T10 top   | Dorsal valve  | Original shell |              | 22.0 | 37.0 | 21.0 |      | 1.762 |
| NMV P340453 | DUES-SL197        | RP3b-001   | Reinodden, Spitsbergen        | Kapp Starostin Fm. | R5 middle | Dorsal valve  | Original shell |              | 34.6 | 34.6 | 26.1 |      | 1.326 |
| NMV P340454 | DUES-SL198        | RP5-001    | Reinodden, Spitsbergen        | Kapp Starostin Fm. | R7        | Dorsal valve  | Original shell |              | 30.0 | 32.0 | 27.2 |      | 1.176 |
| NMV P340455 | DUES-SL199        | AP2-003    | Ahlstrandodden, Spitsbergen   | Kapp Starostin Fm. | A3 lower  | Dorsal valve  | Original shell |              | 22.0 | 22.0 | 20.0 | 6.0  | 1.100 |
| NMV P340456 | DUES-SL200        | AP3-001    | Ahlstrandodden, Spitsbergen   | Kapp Starostin Fm. | A3 middle | Dorsal valve  | Original shell |              | 25.5 | 30.0 | 18.9 |      | 1.587 |
| NMV P340457 | DUES-SL201        | AP7-005    | Ahlstrandodden, Spitsbergen   | Kapp Starostin Fm. | A6        | Dorsal valve  | Original shell |              | 31.2 | 39.0 | 22.5 |      | 1.733 |
| NMV P340458 | DUES-SL202        | AP7-006    | Ahlstrandodden, Spitsbergen   | Kapp Starostin Fm. | A6        | Dorsal valve  | External mould |              | 20.6 | 20.6 | 14.0 |      | 1.471 |
| NMV P340459 | DUES-SL203        | SB3-045    | Skansbukta B, Spitsbergen     | Kapp Starostin Fm. | SB9       | Dorsal valve  | Original shell | Fig. 13C'    | 29.8 | 29.8 | 21.2 | 5.6  | 1.406 |
| NMV P340460 | DUES-SL204        | SB3-046    | Skansbukta B, Spitsbergen     | Kapp Starostin Fm. | SB9       | Dorsal valve  | Original shell |              | 27.1 |      | 28.6 | 4.5  |       |
| NMV P340461 | DUES-SL205        | SB3-047    | Skansbukta B, Spitsbergen     | Kapp Starostin Fm. | SB9       | Dorsal valve  | Original shell |              | 55.0 | 55.0 | 39.2 |      | 1.403 |
| NMV P340462 | Kozhim-GRS001     |            | Kozhim River, Subpolar Ural   | Kozhim Fm.         | GRS-KR2   | Ventral valve | Original shell | Fig. 12S-T   | 24.0 |      | 26.1 |      |       |
| NMV P340463 | Kozhim-GRS002     |            | Kozhim River, Subpolar Ural   | Kozhim Fm.         | GRS-KR4   | Ventral valve | Original shell | Fig. 12R     | 22.1 | 24.0 | 24.0 | 9.0  | 1.000 |
| NMV P340464 | Kozhim-GRS003     |            | Kozhim River, Subpolar Ural   | Kozhim Fm.         | GRS-KR5   | Ventral valve | Original shell | Fig. 12Q     | 20.6 | 20.6 | 19.8 |      | 1.040 |
| NMV P340465 | Kozhim-GRS004     |            | Kozhim River, Subpolar Ural   | Kozhim Fm.         | GRS-KR5a  | Ventral valve | Original shell |              | 15.2 | 15.2 | 14.9 | 6.3  | 1.020 |
| NMV P340466 | Kozhim-GRS005     |            | Kozhim River, Subpolar Ural   | Kozhim Fm.         | GRS-KR5a  | Ventral valve | Original shell | Fig. 12U-V   | 28.4 | 28.4 | 32.0 | 14.2 | 0.888 |
| KOPRIF10003 | KOPRIF-SL2015-001 |            | Scheteligfjellet, Spitsbergen | Vøringen Mb.       | SF0       | Ventral valve | Original shell |              |      |      |      |      |       |
| KOPRIF10004 | KOPRIF-SL003      | SFF04-001  | Scheteligfjellet, Spitsbergen | Kapp Starostin Fm. | SF3 lower | Ventral valve | Original shell |              | 25.0 | 25.0 | 22.3 | 9.9  | 1.121 |
| KOPRIF10005 | KOPRIF-SL004      | SFF04-002  | Scheteligfjellet, Spitsbergen | Kapp Starostin Fm. | SF3 lower | Ventral valve | Original shell |              | 26.0 |      |      |      |       |
| KOPRIF10006 | KOPRIF-SL005      | SFF05-001  | Scheteligfjellet, Spitsbergen | Kapp Starostin Fm. | SF3 lower | Ventral valve | Original shell |              | 15.8 | 15.8 | 14.0 | 6.5  | 1.129 |
| KOPRIF10007 | KOPRIF-SL006      | SFF08-002  | Scheteligfjellet, Spitsbergen | Kapp Starostin Fm. | SF3 upper | Ventral valve | Original shell | Fig. 13J-K   | 23.1 | 23.1 | 21.0 | 9.2  | 1.100 |
| KOPRIF10008 | KOPRIF-SL007      | SFF03-001  | Scheteligfjellet, Spitsbergen | Kapp Starostin Fm. | SF3 lower | Dorsal valve  | Original shell |              | 12.0 | 15.0 | 11.2 |      | 1.339 |
| KOPRIF10009 | KOPRIF-SL008      | SFF07-001  | Scheteligfjellet, Spitsbergen | Kapp Starostin Fm. | SF3 upper | Dorsal valve  | Original shell |              | 23.5 | 23.5 |      |      |       |

***Spiriferella draschei* (Toula, 1875)**

| Registration No.    | Previously given No. | Locality / section      | Formation          | Bed (Horizon) | Shell/Valve     | Preservation   | Figure           | Measure (mm) |            |        |             |         | Note      |
|---------------------|----------------------|-------------------------|--------------------|---------------|-----------------|----------------|------------------|--------------|------------|--------|-------------|---------|-----------|
|                     |                      |                         |                    |               |                 |                |                  | Width        | Ad. Width* | Length | Thickness   | Ad. W:L |           |
| NHMW 1875/0041/0020 |                      | Akseløya, Spitsbergen   | Kapp Starostin Fm. |               | Ventral valve   | Original shell | Figs 4I-J, 15A-D | 39.0         | 39.0       | 45.0   | 23.5        | 0.867   | Lectotype |
| PMO A26116          |                      | Bünsowland, Spitsbergen | Kapp Starostin Fm. |               | Conjoined shell | Original shell | Fig. 15M-P       | 45.3         | 45.3       | 56.0   | 22.0 (22.3) | 0.809   |           |
| PMO 234.049         |                      | Skansbukta, Spitsbergen | Kapp Starostin Fm. |               | Conjoined shell | Original shell | Fig. 15E-H       | 49.0         |            |        |             |         |           |
| PMO 234.050         |                      | Skansbukta, Spitsbergen | Kapp Starostin Fm. |               | Ventral valve   | Original shell | Fig. 15I-K       | 44.5         | 44.5       | 54.1   | 29.3        | 0.823   |           |
| PMO 234.051         |                      | Skansbukta, Spitsbergen | Kapp Starostin Fm. |               | Ventral valve   | Original shell | Fig. 15L         | 47.6         | 47.6       | 48.2   | 18.0        | 0.988   |           |
| PMO 234.052         |                      | Bünsowland, Spitsbergen | Kapp Starostin Fm. |               | Ventral valve   | Original shell | Fig. 16E-H       | 41.5         | 41.5       | 54.3   | 25.0        | 0.764   |           |

|             |                   |         |                               |                    |     |               |                |                |      |      |      |      |       |                    |
|-------------|-------------------|---------|-------------------------------|--------------------|-----|---------------|----------------|----------------|------|------|------|------|-------|--------------------|
| NMV P340467 | DUES-SL035        | SB1-008 | Skansbukta B, Spitsbergen     | Vøringen Mb.       | SB1 | Ventral valve | Original shell |                | 55.8 | 65.6 | 53.4 | 24.5 | 1.228 | Serially sectioned |
| NMV P340468 | DUES-SL036        | SB3-005 | Skansbukta B, Spitsbergen     | Kapp Starostin Fm. | SB9 | Ventral valve | Original shell | Figs 14, 16M-N | 49.5 | 49.5 | 56.1 | 23.2 | 0.882 |                    |
| NMV P340469 | DUES-SL037        | SB3-006 | Skansbukta B, Spitsbergen     | Kapp Starostin Fm. | SB9 | Ventral valve | Original shell | Fig. 16J       | 57.9 | 66.0 | 64.0 | 24.0 | 1.031 |                    |
| NMV P340470 | DUES-SL038        | SB3-007 | Skansbukta B, Spitsbergen     | Kapp Starostin Fm. | SB9 | Ventral valve | Original shell | Fig. 16L       | 58.1 | 58.1 | 58.9 | 24.8 | 0.986 |                    |
| NMV P340471 | DUES-SL039        | SB3-008 | Skansbukta B, Spitsbergen     | Kapp Starostin Fm. | SB9 | Ventral valve | Original shell | Fig. 16C-D     |      |      |      |      |       |                    |
| NMV P340472 | DUES-SL040        | SB3-009 | Skansbukta B, Spitsbergen     | Kapp Starostin Fm. | SB9 | Ventral valve | Original shell |                |      |      |      |      |       |                    |
| NMV P340473 | DUES-SL041        | S1-017  | Skansen(?), Spitsbergen       | Vøringen Mb.       |     | Ventral valve | Original shell | Fig. 16K       | 53.0 | 53.0 | 70.5 | 26.7 | 0.752 |                    |
| KOPRIF10010 | KOPRIF-SL2015-002 |         | Skanbukta A, Spitsbergen      | Vøringen Mb.       | SA1 | Ventral valve | Original shell | Fig. 16A-B     | 46.1 | 46.1 | 46.0 | 24.5 | 1.002 |                    |
| KOPRIF10011 | KOPRIF-SL2015-003 |         | Skanbukta A, Spitsbergen      | Vøringen Mb.       | SA1 | Ventral valve | Original shell | Fig. 16I       | 49.6 | 49.6 | 50.0 | 24.3 | 0.992 |                    |
| KOPRIF10012 | KOPRIF-SL2015-004 |         | Scheteligfjellet, Spitsbergen | Vøringen Mb.       | SF0 | Ventral valve | Original shell |                | 36.1 | 36.1 | 43.0 |      | 0.840 |                    |

***Spiriferella protodraschei* sp. nov. Lee & Shi**

| Registration No. | Previously given No. |         | Locality / section        | Formation    | Bed (Horizon) | Shell/Valve     | Preservation   | Figure         | Measure (mm) |            |        |             |         | Note                         |
|------------------|----------------------|---------|---------------------------|--------------|---------------|-----------------|----------------|----------------|--------------|------------|--------|-------------|---------|------------------------------|
|                  |                      |         |                           |              |               |                 |                |                | Width        | Ad. Width* | Length | Thickness   | Ad. W:L |                              |
| NMV P340474      | DUES-SL034           | SA1-033 | Skansbukta A, Spitsbergen | Vøringen Mb. | SA1           | Conjoined shell | Original shell | Figs 17, 18A-E | 52.7         | 52.7       | 47.2   | 29.7 (41.8) | 1.117   | Holotype, serially sectioned |
| NMV P340475      | DUES-SL033           | W-a-003 | Idodalen, Spitsbergen     | Vøringen Mb. | la            | Ventral valve   | Original shell | Fig. 18F-G     | 38.7         | 38.7       |        | 14.0        |         |                              |

***Spiriferella* cf. *S. interplicata* (Rothpletz, 1892)**

| Registration No. | Previously given No. | Locality / section          | Formation         | Bed (Horizon) | Shell/Valve     | Preservation   | Figure      | Measure (mm) |            |        |            |         | Note |
|------------------|----------------------|-----------------------------|-------------------|---------------|-----------------|----------------|-------------|--------------|------------|--------|------------|---------|------|
|                  |                      |                             |                   |               |                 |                |             | Width        | Ad. Width* | Length | Thickness  | Ad. W:L |      |
| NMV P340476      | Kozhim-GRS009        | Kozhim River, Subpolar Ural | Kozhim Rudnik Fm. | GRS-KR10      | Conjoined shell | Original shell | Fig. 18W-A' | 22.1         | 22.1       | 21.6   | 8.2 (13.0) | 1.023   |      |

***Spiriferella* sp.**

| Registration No. | Previously given No. |         | Locality / section          | Formation          | Bed (Horizon) | Shell/Valve   | Preservation   | Figure     | Measure (mm) |            |        |           |         | Note |
|------------------|----------------------|---------|-----------------------------|--------------------|---------------|---------------|----------------|------------|--------------|------------|--------|-----------|---------|------|
|                  |                      |         |                             |                    |               |               |                |            | Width        | Ad. Width* | Length | Thickness | Ad. W:L |      |
| NMV P340477      | DUES-SL206           | AP2-001 | Ahlstrandodden, Spitsbergen | Kapp Starostin Fm. | A3 lower      | Ventral valve | Original shell | Fig. 18H-K | 46.5         | 46.5       | 44.8   |           | 1.038   |      |
| NMV P340478      | DUES-SL207           | SB3-010 | Skansbukta B, Spitsbergen   | Kapp Starostin Fm. | SB9           | Ventral valve | Original shell |            |              |            | 60.0   |           |         |      |

***Eridmatus talbeicus* (Ifanova, 1972)**

| Registration No. | Previously given No. | Locality / section          | Formation          | Bed (Horizon) | Shell/Valve     | Preservation   | Figure     | Measure (mm) |            |        |             |         | Note |
|------------------|----------------------|-----------------------------|--------------------|---------------|-----------------|----------------|------------|--------------|------------|--------|-------------|---------|------|
|                  |                      |                             |                    |               |                 |                |            | Width        | Ad. Width* | Length | Thickness   | Ad. W:L |      |
| PMO 234.053      |                      | Hambergfjellet, Bjørnøya    | Hambergfjellet Fm. |               | Conjoined shell | Original shell | Fig. 18U-V | 27.0         | 27.0       |        | 16.0 (26.1) |         |      |
| PMO 234.054      |                      | Hambergfjellet, Bjørnøya    | Hambergfjellet Fm. |               | Ventral valve   | Original shell |            | 21.0         | 26.0       |        |             |         |      |
| NMV P340479      | Kozhim-GRS006        | Kozhim River, Subpolar Ural | Kozhim Rudnik Fm.  | GRS-KR10      | Conjoined shell | Original shell | Fig. 18L-N | 22.2         | 24.0       | 30.3   | 13.0 (20.5) | 0.792   |      |
| NMV P340480      | Kozhim-GRS007        | Kozhim River, Subpolar Ural | Kozhim Rudnik Fm.  | GRS-KR10      | Conjoined shell | Original shell | Fig. 18O-R | 25.2         | 25.2       | 29.1   | 11.2 (18.5) | 0.866   |      |
| NMV P340481      | Kozhim-GRS008        | Kozhim River, Subpolar Ural | Kozhim Rudnik Fm.  | GRS-KR10      | Dorsal valve    | Original shell | Fig. 18S-T | 28.2         | 28.2       | 30.0   |             | 0.940   |      |

***Arcullina polaris* (Wiman, 1914)**

| Registration No. | Previously given No. |         | Locality / section         | Formation          | Bed (Horizon) | Shell/Valve   | Preservation   | Figure         | Measure (mm) |            |        |           |         | Note               |
|------------------|----------------------|---------|----------------------------|--------------------|---------------|---------------|----------------|----------------|--------------|------------|--------|-----------|---------|--------------------|
|                  |                      |         |                            |                    |               |               |                |                | Width        | Ad. Width* | Length | Thickness | Ad. W:L |                    |
| PMO 234.055      |                      |         | Hambergfjellet, Bjørnøya   | Hambergfjellet Fm. |               | Ventral valve | Original shell | Fig. 21Z       | 18.1         | 18.1       | 18.0   | 10.3      | 1.006   |                    |
| PMO 234.056      |                      |         | Hambergfjellet, Bjørnøya   | Hambergfjellet Fm. |               | Ventral valve | Original shell | Fig. 21A'      | 19.6         | 20.2       | 21.5   | 9.4       | 0.940   |                    |
| PMO 234.057      |                      |         | Hambergfjellet, Bjørnøya   | Hambergfjellet Fm. |               | Ventral valve | Original shell | Fig. 21B'      | 21.2         |            |        | 10.4      |         |                    |
| PMO 234.058      |                      |         | Hambergfjellet, Bjørnøya   | Hambergfjellet Fm. |               | Ventral valve | Original shell | Fig. 21C'      | 22.6         | 24.0       | 25.7   | 9.0       | 0.934   |                    |
| PMO 234.059      |                      |         | Hambergfjellet, Bjørnøya   | Hambergfjellet Fm. |               | Ventral valve | Original shell | Fig. 21D'-F'   | 25.1         | 25.1       | 29.8   | 13.4      | 0.842   |                    |
| PMO 234.060      |                      |         | Skansbukta, Spitsbergen    | Kapp Starostin Fm. |               | Ventral valve | Original shell |                | 43.1         | 43.1       | 47.9   | 24.1      | 0.900   |                    |
| PMO A26051       |                      |         | Gipshuken, Spitsbergen     | Vøringen Mb.       |               | Ventral valve | Original shell |                | 45.5         | 45.5       | 52.9   | 20.4      | 0.860   |                    |
| PMO A9885        |                      |         | Skansbukta(?), Spitsbergen | Kapp Starostin Fm. |               | Dorsal valve  | Original shell | Fig. 21I       | 11.2         | 11.2       | 10.1   |           | 1.109   |                    |
| NMV P340482      | DUES-SL208           | F1-002  | Festningen, Spitsbergen    | Vøringen Mb.       | F1            | Ventral valve | Original shell | Figs 20, 21V-Y | 40.1         | 40.1       | 42.7   | 18.3      | 0.939   | Serially sectioned |
| NMV P340483      | DUES-SL209           | T1-006  | Trygghamna, Spitsbergen    | Vøringen Mb.       | T1            | Ventral valve | Original shell | Fig. 21S       | 31.6         | 31.6       | 38.4   | 19.5      | 0.823   |                    |
| NMV P340484      | DUES-SL210           | R1-004  | Reinodden, Spitsbergen     | Vøringen Mb.       | R1            | Ventral valve | Original shell | Fig. 21Q-R     | 35.6         | 42.2       | 45.0   | 16.5      | 0.938   |                    |
| NMV P340485      | DUES-SL211           | R1-005  | Reinodden, Spitsbergen     | Vøringen Mb.       | R1            | Ventral valve | Original shell |                |              |            | 25.3   | 13.6      |         |                    |
| NMV P340486      | DUES-SL212           | W-a-002 | Idodalen, Spitsbergen      | Vøringen Mb.       | la            | Ventral valve | Original shell |                | 39.0         | 45.0       | 45.2   | 19.2      | 0.996   |                    |
| NMV P340487      | DUES-SL213           | SA1-028 | Skansbukta A, Spitsbergen  | Vøringen Mb.       | SA1           | Ventral valve | Original shell | Fig. 21U       | 47.6         | 47.6       | 51.4   | 24.2      | 0.926   |                    |

|             |                   |         |                           |              |     |               |                |            |      |      |      |      |       |
|-------------|-------------------|---------|---------------------------|--------------|-----|---------------|----------------|------------|------|------|------|------|-------|
| NMV P340488 | DUES-SL214        | SA1-029 | Skansbukta A, Spitsbergen | Vøringen Mb. | SA1 | Ventral valve | Original shell |            | 44.9 | 44.9 | 45.2 | 25.9 | 0.993 |
| NMV P340489 | DUES-SL215        | SA1-030 | Skansbukta A, Spitsbergen | Vøringen Mb. | SA1 | Ventral valve | Original shell |            | 36.1 | 36.1 | 41.1 | 19.8 | 0.878 |
| NMV P340490 | DUES-SL216        | SA1-031 | Skansbukta A, Spitsbergen | Vøringen Mb. | SA1 | Ventral valve | Original shell | Fig. 21E-H | 34.3 | 34.3 | 35.5 | 16.0 | 0.966 |
| NMV P340491 | DUES-SL217        | SB1-001 | Skansbukta B, Spitsbergen | Vøringen Mb. | SB1 | Ventral valve | Original shell |            | 51.4 | 51.4 | 52.1 | 22.1 | 0.987 |
| NMV P340492 | DUES-SL218        | SB1-002 | Skansbukta B, Spitsbergen | Vøringen Mb. | SB1 | Ventral valve | Original shell |            | 56.1 | 56.1 | 54.0 | 29.2 | 1.039 |
| NMV P340493 | DUES-SL219        | SB1-003 | Skansbukta B, Spitsbergen | Vøringen Mb. | SB1 | Ventral valve | Original shell |            | 44.9 | 44.9 | 50.2 | 25.9 | 0.894 |
| NMV P340494 | DUES-SL220        | SB1-004 | Skansbukta B, Spitsbergen | Vøringen Mb. | SB1 | Ventral valve | Original shell |            | 34.4 | 35.6 | 43.1 | 17.2 | 0.826 |
| NMV P340495 | DUES-SL221        | SB1-005 | Skansbukta B, Spitsbergen | Vøringen Mb. | SB1 | Ventral valve | Original shell |            | 41.7 | 41.7 | 49.1 | 20.6 | 0.849 |
| NMV P340496 | DUES-SL222        | SB1-006 | Skansbukta B, Spitsbergen | Vøringen Mb. | SB1 | Ventral valve | Original shell |            | 50.2 | 50.2 | 49.8 | 21.7 | 1.008 |
| NMV P340497 | DUES-SL223        | SB1-007 | Skansbukta B, Spitsbergen | Vøringen Mb. | SB1 | Ventral valve | Original shell |            | 37.9 | 37.9 | 38.1 | 16.2 | 0.995 |
| NMV P340498 | DUES-SL224        | S1-009  | Skansen(?), Spitsbergen   | Vøringen Mb. |     | Ventral valve | Original shell | Fig. 21A-D | 31.9 | 31.9 | 34.1 | 15.9 | 0.935 |
| NMV P340499 | DUES-SL225        | S1-010  | Skansen(?), Spitsbergen   | Vøringen Mb. |     | Ventral valve | Original shell | Fig. 21L-O | 41.9 | 41.9 | 46.5 | 21.2 | 0.901 |
| NMV P340500 | DUES-SL226        | S1-011  | Skansen(?), Spitsbergen   | Vøringen Mb. |     | Ventral valve | Original shell |            | 43.0 | 43.0 | 45.9 | 22.1 | 0.937 |
| NMV P340501 | DUES-SL227        | S1-012  | Skansen(?), Spitsbergen   | Vøringen Mb. |     | Ventral valve | Original shell |            | 34.1 | 34.1 | 36.2 | 19.4 | 0.942 |
| NMV P340502 | DUES-SL228        | S1-013  | Skansen(?), Spitsbergen   | Vøringen Mb. |     | Ventral valve | Original shell |            | 44.3 | 44.3 | 45.2 | 20.0 | 0.980 |
| NMV P340503 | DUES-SL229        | S1-014  | Skansen(?), Spitsbergen   | Vøringen Mb. |     | Ventral valve | Original shell | Fig. 21T   | 40.9 | 40.9 | 46.1 | 22.9 | 0.887 |
| NMV P340504 | DUES-SL230        | S1-015  | Skansen(?), Spitsbergen   | Vøringen Mb. |     | Ventral valve | Original shell |            | 37.0 | 40.4 | 44.8 | 17.6 | 0.902 |
| NMV P340505 | DUES-SL231        | S1-016  | Skansen(?), Spitsbergen   | Vøringen Mb. |     | Ventral valve | Original shell |            | 39.2 | 39.2 | 44.9 | 24.2 | 0.873 |
| NMV P340506 | DUES-SL232        | SA1-032 | Skansbukta A, Spitsbergen | Vøringen Mb. | SA1 | Dorsal valve  | Original shell | Fig. 21J-K | 25.2 | 25.2 | 18.6 | 10.5 | 1.355 |
| KOPRIF10013 | KOPRIF-SL2015-005 |         | Skansbukta A, Spitsbergen | Vøringen Mb. | SA1 | Ventral valve | Original shell | Fig. 21P   | 24.1 | 26.0 | 21.0 |      | 1.238 |
| KOPRIF10014 | KOPRIF-SL2015-006 |         | Skansbukta A, Spitsbergen | Vøringen Mb. | SA1 | Ventral valve | Original shell |            | 37.1 | 37.1 | 39.7 |      | 0.935 |
| KOPRIF10015 | KOPRIF-SL2015-007 |         | Skansbukta A, Spitsbergen | Vøringen Mb. | SA1 | Ventral valve | Original shell |            | 34.8 | 34.8 |      |      |       |
| KOPRIF10016 | KOPRIF-SL2015-008 |         | Skansbukta A, Spitsbergen | Vøringen Mb. | SA1 | Ventral valve | Original shell |            | 29.5 | 34.0 | 40.3 | 20.3 | 0.844 |
| KOPRIF10017 | KOPRIF-SL2015-009 |         | Skansbukta A, Spitsbergen | Vøringen Mb. | SA1 | Ventral valve | Original shell |            | 29.0 |      |      | 17.5 |       |
| KOPRIF10018 | KOPRIF-SL2015-010 |         | Skansbukta A, Spitsbergen | Vøringen Mb. | SA1 | Ventral valve | Original shell |            | 37.0 | 40.0 | 42.0 | 16.5 | 0.952 |
| KOPRIF10019 | KOPRIF-SL2015-011 |         | Skansbukta A, Spitsbergen | Vøringen Mb. | SA1 | Ventral valve | Original shell |            | 22.0 |      |      |      |       |
| KOPRIF10020 | KOPRIF-SL2015-012 |         | Skansbukta A, Spitsbergen | Vøringen Mb. | SA1 | Ventral valve | Original shell |            | 26.9 |      |      |      |       |

***Arcullina? enokiani* sp. nov. Lee & Shi**

| Registration No. | Previously given No. | Locality / section          | Formation         | Bed (Horizon) | Shell/Valve   | Preservation    | Figure     | Measure (mm) |            |        |           |         | Note     |
|------------------|----------------------|-----------------------------|-------------------|---------------|---------------|-----------------|------------|--------------|------------|--------|-----------|---------|----------|
|                  |                      |                             |                   |               |               |                 |            | Width        | Ad. Width* | Length | Thickness | Ad. W:L |          |
| NMV P340507      | Kozhim-GRS010        | Kozhim River, Subpolar Ural | Kozhim Fm.        | GRS-KR3       | Ventral valve | Originall shell | Fig. 22I-K | 66.0         | 66.0       | 72.0   | 43.0      | 0.917   | Holotype |
| NMV P340508      | Kozhim-GRS011        | Kozhim River, Subpolar Ural | Kozhim Fm.        | GRS-KR3       | Ventral valve | Originall shell | Fig. 22G-H | 70.0         | 72.0       | 64.0   |           | 1.125   | Paratype |
| NMV P340509      | Kozhim-GRS012        | Kozhim River, Subpolar Ural | Kozhim Fm.        | GRS-KR3       | Ventral valve | Originall shell | Fig. 22A-B | 16.0         | 19.0       | 11.5   |           | 1.652   |          |
| NMV P340510      | Kozhim-GRS013        | Kozhim River, Subpolar Ural | Kozhim Rudnik Fm. | GRS-KR8       | Ventral valve | Originall shell | Fig. 22C   | 20.5         |            | 23.5   |           |         |          |
| NMV P340511      | Kozhim-GRS014        | Kozhim River, Subpolar Ural | Kozhim Rudnik Fm. | GRS-KR8       | Ventral valve | Originall shell | Fig. 22D   | 22.3         | 22.3       | 16.5   |           | 1.352   |          |
| NMV P340512      | Kozhim-GRS015        | Kozhim River, Subpolar Ural | Kozhim Rudnik Fm. | GRS-KR8       | Ventral valve | Originall shell | Fig. 22E   | 21.0         | 22.0       | 14.0   |           | 1.571   |          |
| NMV P340513      | Kozhim-GRS016        | Kozhim River, Subpolar Ural | Kozhim Rudnik Fm. | GRS-KR8       | Dorsal valve  | Originall shell | Fig. 22F   | 16.0         | 22.0       | 12.0   |           | 1.833   |          |

***Timaniella wilczeki* (Toula, 1873)**

| Registration No.    | Previously given No.  |         | Locality / section         | Formation          | Bed (Horizon) | Shell/Valve     | Preservation    | Figure     | Measure (mm) |            |        |             |         | Note                     |
|---------------------|-----------------------|---------|----------------------------|--------------------|---------------|-----------------|-----------------|------------|--------------|------------|--------|-------------|---------|--------------------------|
|                     |                       |         |                            |                    |               |                 |                 |            | Width        | Ad. Width* | Length | Thickness   | Ad. W:L |                          |
| NHMW 2017/0119/0001 | NHMW 1886/0007/0004-1 |         | Sørkapp(?), Spitsbergen    | Tokrossøya Fm.     |               | Ventral valve   | External mould  | Fig. 25A   | 45.7         | 45.7       | 23.4   |             | 1.953   | Lectotype                |
| NHMW 2017/0119/0002 | NHMW 1886/0007/0004-1 |         | Sørkapp(?), Spitsbergen    | Tokrossøya Fm.     |               | Ventral valve   | Internal mould  | Fig. 25B   |              |            |        |             |         | Counterpart of lectotype |
| PMO A9880           |                       |         | Tempelfjellet, Spitsgergen | Kapp Starostin Fm. |               | Conjoined shell | Originall shell | Fig. 25J-N | 61.2         | 64.0       | 42.3   | 18.0 (33.5) | 1.513   |                          |
| PMO 227.384         |                       |         | Skansbukta, Spitsbergen    | Kapp Starostin Fm. |               | Conjoined shell | Originall shell | Fig. 26A-B | 53.2         | 56.0       | 36.1   |             | 1.551   |                          |
| NMV P340514         | DUES-SL233            | SA1-001 | Skansbukta A, Spitsbergen  | Vøringen Mb.       | SA1           | Conjoined shell | Original shell  | Fig. 25D-H | 63.4         | 66.2       | 41.3   | 20.9 (38.7) | 1.603   |                          |
| NMV P340515         | DUES-SL234            | SA1-002 | Skansbukta A, Spitsbergen  | Vøringen Mb.       | SA1           | Conjoined shell | Original shell  | Fig. 24    | 61.9         | 61.9       | 37.6   | 19.0 (35.8) | 1.646   | Serially sectioned       |
| NMV P340516         | DUES-SL235            | SA1-003 | Skansbukta A, Spitsbergen  | Vøringen Mb.       | SA1           | Conjoined shell | Original shell  |            | 67.8         | 71.2       | 37.8   | 17.1 (31.0) | 1.884   |                          |
| NMV P340517         | DUES-SL236            | SA1-004 | Skansbukta A, Spitsbergen  | Vøringen Mb.       | SA1           | Conjoined shell | Original shell  |            |              |            | 40.1   | 13.0 (20.9) |         |                          |
| NMV P340518         | DUES-SL237            | F1-001  | Festningen, Spitsbergen    | Vøringen Mb.       | F1            | Ventral valve   | Original shell  |            | 47.6         | 49.2       | 33.5   | 11.6        | 1.469   |                          |
| NMV P340519         | DUES-SL238            | T1-004  | Trygghamna, Spitsbergen    | Vøringen Mb.       | T1            | Ventral valve   | Original shell  |            | 63.7         | 63.7       |        | 14.0        |         |                          |
| NMV P340520         | DUES-SL239            | R1-001  | Reinodden, Spitsbergen     | Vøringen Mb.       | R1            | Ventral valve   | Original shell  | Fig. 26D-F | 75.5         | 82.4       | 45.6   | 16.5        | 1.807   |                          |

|             |                   |         |                               |              |     |               |                |            |      |      |      |      |       |
|-------------|-------------------|---------|-------------------------------|--------------|-----|---------------|----------------|------------|------|------|------|------|-------|
| NMV P340521 | DUES-SL240        | R1-002  | Reinodden, Spitsbergen        | Vøringen Mb. | R1  | Ventral valve | Original shell |            | 42.3 | 45.0 | 26.5 | 10.5 | 1.698 |
| NMV P340522 | DUES-SL241        | AP1-001 | Ahlstrandodden, Spitsbergen   | Vøringen Mb. | A1  | Ventral valve | Original shell |            | 44.5 | 58.2 |      |      |       |
| NMV P340523 | DUES-SL242        | AP1-002 | Ahlstrandodden, Spitsbergen   | Vøringen Mb. | A1  | Ventral valve | Original shell |            | 43.1 |      |      | 13.0 |       |
| NMV P340524 | DUES-SL243        | W-a-001 | Idodalen, Spitsbergen         | Vøringen Mb. | la  | Ventral valve | Original shell | Fig. 25I   | 51.7 | 51.7 | 32.4 | 14.0 | 1.596 |
| NMV P340525 | DUES-SL244        | SA1-005 | Skansbukta A, Spitsbergen     | Vøringen Mb. | SA1 | Ventral valve | Original shell |            | 68.8 | 69.2 | 43.0 | 14.9 | 1.609 |
| NMV P340526 | DUES-SL245        | SA1-006 | Skansbukta A, Spitsbergen     | Vøringen Mb. | SA1 | Ventral valve | Original shell | Fig. 25C   | 66.9 | 66.9 | 43.5 | 16.7 | 1.538 |
| NMV P340527 | DUES-SL246        | SA1-007 | Skansbukta A, Spitsbergen     | Vøringen Mb. | SA1 | Ventral valve | Original shell |            | 68.1 | 70.2 | 38.9 | 15.2 | 1.805 |
| NMV P340528 | DUES-SL247        | SA1-008 | Skansbukta A, Spitsbergen     | Vøringen Mb. | SA1 | Ventral valve | Original shell |            | 66.6 | 72.0 | 42.4 | 17.0 | 1.698 |
| NMV P340529 | DUES-SL248        | SA1-009 | Skansbukta A, Spitsbergen     | Vøringen Mb. | SA1 | Ventral valve | Original shell |            | 78.2 | 78.2 | 46.1 | 16.3 | 1.696 |
| NMV P340530 | DUES-SL249        | SA1-010 | Skansbukta A, Spitsbergen     | Vøringen Mb. | SA1 | Ventral valve | Original shell |            |      |      | 42.3 |      |       |
| NMV P340531 | DUES-SL250        | SA1-011 | Skansbukta A, Spitsbergen     | Vøringen Mb. | SA1 | Ventral valve | Original shell |            | 58.1 | 71.8 | 36.0 | 12.8 | 1.994 |
| NMV P340532 | DUES-SL251        | SA1-012 | Skansbukta A, Spitsbergen     | Vøringen Mb. | SA1 | Ventral valve | Original shell |            | 47.9 | 58.0 | 33.9 | 14.9 | 1.711 |
| NMV P340533 | DUES-SL252        | SA1-013 | Skansbukta A, Spitsbergen     | Vøringen Mb. | SA1 | Ventral valve | Original shell |            |      |      | 44.0 |      |       |
| NMV P340534 | DUES-SL253        | SA1-014 | Skansbukta A, Spitsbergen     | Vøringen Mb. | SA1 | Ventral valve | Original shell |            | 51.0 | 67.2 | 42.2 | 17.5 | 1.592 |
| NMV P340535 | DUES-SL254        | SA1-015 | Skansbukta A, Spitsbergen     | Vøringen Mb. | SA1 | Ventral valve | Original shell |            | 47.6 | 47.6 | 29.5 | 12.4 | 1.614 |
| NMV P340536 | DUES-SL255        | SA1-016 | Skansbukta A, Spitsbergen     | Vøringen Mb. | SA1 | Ventral valve | Original shell |            | 31.5 | 38.0 | 22.1 | 10.0 | 1.719 |
| NMV P340537 | DUES-SL256        | SA1-017 | Skansbukta A, Spitsbergen     | Vøringen Mb. | SA1 | Ventral valve | Original shell |            | 45.8 | 49.0 | 31.9 | 12.0 | 1.536 |
| NMV P340538 | DUES-SL257        | SA1-018 | Skansbukta A, Spitsbergen     | Vøringen Mb. | SA1 | Ventral valve | Original shell |            | 51.9 | 51.9 | 32.8 | 11.2 | 1.582 |
| NMV P340539 | DUES-SL258        | SA1-019 | Skansbukta A, Spitsbergen     | Vøringen Mb. | SA1 | Ventral valve | Original shell |            | 53.0 |      |      |      |       |
| NMV P340540 | DUES-SL259        | SA1-020 | Skansbukta A, Spitsbergen     | Vøringen Mb. | SA1 | Ventral valve | Original shell |            | 75.8 | 80.0 |      |      |       |
| NMV P340541 | DUES-SL260        | SA1-021 | Skansbukta A, Spitsbergen     | Vøringen Mb. | SA1 | Ventral valve | Original shell |            | 63.8 | 63.8 | 35.9 | 17.5 | 1.777 |
| NMV P340542 | DUES-SL261        | SA1-022 | Skansbukta A, Spitsbergen     | Vøringen Mb. | SA1 | Ventral valve | Original shell |            | 65.1 | 65.1 | 36.2 | 16.9 | 1.798 |
| NMV P340543 | DUES-SL262        | SA1-027 | Skansbukta A, Spitsbergen     | Vøringen Mb. | SA1 | Ventral valve | Original shell |            | 66.2 | 66.2 | 49.5 | 17.0 | 1.337 |
| NMV P340544 | DUES-SL263        | S1-001  | Skansen(?), Spitsbergen       | Vøringen Mb. |     | Ventral valve | Original shell |            | 56.1 | 56.1 | 35.5 | 18.0 | 1.580 |
| NMV P340545 | DUES-SL264        | S1-002  | Skansen(?), Spitsbergen       | Vøringen Mb. |     | Ventral valve | Original shell |            | 58.8 | 58.8 | 35.9 | 13.4 | 1.638 |
| NMV P340546 | DUES-SL265        | S1-003  | Skansen(?), Spitsbergen       | Vøringen Mb. |     | Ventral valve | Original shell | Fig. 26C   | 48.2 | 54.6 | 24.0 | 10.0 | 2.275 |
| NMV P340547 | DUES-SL266        | S1-004  | Skansen(?), Spitsbergen       | Vøringen Mb. |     | Ventral valve | Original shell |            | 49.2 | 62.2 | 32.3 | 11.9 | 1.926 |
| NMV P340548 | DUES-SL267        | S1-005  | Skansen(?), Spitsbergen       | Vøringen Mb. |     | Ventral valve | Original shell |            | 58.4 | 63.6 | 36.4 | 12.7 | 1.747 |
| NMV P340549 | DUES-SL268        | S1-006  | Skansen(?), Spitsbergen       | Vøringen Mb. |     | Ventral valve | Original shell |            | 36.0 | 42.2 | 24.9 | 10.2 | 1.695 |
| NMV P340550 | DUES-SL269        | S1-007  | Skansen(?), Spitsbergen       | Vøringen Mb. |     | Ventral valve | Original shell |            | 56.1 | 59.8 | 44.5 | 16.5 | 1.344 |
| NMV P340551 | DUES-SL270        | S1-008  | Skansen(?), Spitsbergen       | Vøringen Mb. |     | Ventral valve | Original shell |            | 52.0 |      | 42.6 | 11.4 |       |
| NMV P340552 | DUES-SL271        | SA1-023 | Skansbukta A, Spitsbergen     | Vøringen Mb. | SA1 | Ventral valve | Original shell |            | 31.5 | 60.0 | 31.5 |      | 1.905 |
| NMV P340553 | DUES-SL272        | SA1-024 | Skansbukta A, Spitsbergen     | Vøringen Mb. | SA1 | Dorsal valve  | Original shell |            | 51.0 | 62.6 | 34.2 | 15.5 | 1.830 |
| NMV P340554 | DUES-SL273        | SA1-025 | Skansbukta A, Spitsbergen     | Vøringen Mb. | SA1 | Dorsal valve  | Original shell | Fig. 26G-H | 59.6 |      | 36.5 | 13.1 |       |
| NMV P340555 | DUES-SL274        | SA1-026 | Skansbukta A, Spitsbergen     | Vøringen Mb. | SA1 | Dorsal valve  | Original shell |            | 24.2 | 32.0 | 17.2 | 7.0  | 1.860 |
| KOPRIF10021 | KOPRIF-SL2015-013 |         | Scheteligfjellet, Spitsbergen | Vøringen Mb. | SF0 | Ventral valve | Original shell |            | 31.2 | 36.0 |      |      |       |
| KOPRIF10022 | KOPRIF-SL2015-014 |         | Scheteligfjellet, Spitsbergen | Vøringen Mb. | SF0 | Dorsal valve  | Original shell |            | 31.5 |      |      |      |       |
| KOPRIF10023 | KOPRIF-SL2015-015 |         | Skansbukta A, Spitsbergen     | Vøringen Mb. | SA1 | Ventral valve | Original shell |            | 32.0 |      |      |      |       |

***Timaniella harkeri* Waterhouse in Bamber & Waterhouse, 1971**

| Registration No. | Previously given No. | Locality / section               | Formation      | Bed (Horizon) | Shell/Valve     | Preservation    | Figure          | Measure (mm) |            |        |             |         | Note             |
|------------------|----------------------|----------------------------------|----------------|---------------|-----------------|-----------------|-----------------|--------------|------------|--------|-------------|---------|------------------|
|                  |                      |                                  |                |               |                 |                 |                 | Width        | Ad. Width* | Length | Thickness   | Ad. W:L |                  |
| NMV P340556      | GSC26406-SL007       | Grinnell Peninsula, Devon Island | Assistance Fm. | GSC26406      | Conjoined shell | Originall shell | Figs 27, 28W-A' | 39.2         | 40.4       | 21.1   | 8.8 (15.3)  | 1.915   | Micro-CT scanned |
| NMV P340557      | GSC26406-SL008       | Grinnell Peninsula, Devon Island | Assistance Fm. | GSC26406      | Conjoined shell | Originall shell | Fig. 28B'-D'    | 38.9         | 38.9       | 27.8   | 10.0 (16.6) | 1.399   | Sectioned        |
| NMV P340558      | GSC26406-SL009       | Grinnell Peninsula, Devon Island | Assistance Fm. | GSC26406      | Conjoined shell | Originall shell | Fig. 28E'-F'    | 53.4         | 53.4       | 26.6   | 9.8 (15.4)  | 2.008   |                  |
| NMV P340559      | GSC26406-SL010       | Grinnell Peninsula, Devon Island | Assistance Fm. | GSC26406      | Conjoined shell | Originall shell |                 | 48.3         | 48.3       | 32.4   | 12.7 (17.3) | 1.491   |                  |
| NMV P340560      | GSC26406-SL011       | Grinnell Peninsula, Devon Island | Assistance Fm. | GSC26406      | Ventral valve   | Originall shell | Fig. 28A-C      | 19.8         | 19.8       | 12.2   | 6.2         | 1.623   |                  |
| NMV P340561      | GSC26406-SL012       | Grinnell Peninsula, Devon Island | Assistance Fm. | GSC26406      | Ventral valve   | Originall shell | Fig. 28D-G      | 26.9         | 26.9       | 13.6   | 7.6         | 1.978   |                  |
| NMV P340562      | GSC26406-SL013       | Grinnell Peninsula, Devon Island | Assistance Fm. | GSC26406      | Ventral valve   | Originall shell | Fig. 28H-J      | 30.2         | 30.2       | 19.6   | 7.4         | 1.541   |                  |
| NMV P340563      | GSC26406-SL014       | Grinnell Peninsula, Devon Island | Assistance Fm. | GSC26406      | Ventral valve   | Originall shell | Fig. 28K-M      | 33.1         | 33.1       | 20.1   | 8.4         | 1.647   |                  |
| NMV P340564      | GSC26406-SL015       | Grinnell Peninsula, Devon Island | Assistance Fm. | GSC26406      | Ventral valve   | Originall shell |                 | 32.5         | 32.5       | 21.1   | 7.2         | 1.540   |                  |
| NMV P340565      | GSC26406-SL016       | Grinnell Peninsula, Devon Island | Assistance Fm. | GSC26406      | Ventral valve   | Originall shell | Fig. 28N-P      | 35.0         | 35.0       | 21.9   | 8.6         | 1.598   |                  |

|             |                |                                  |                |          |               |                 |            |      |      |      |     |       |
|-------------|----------------|----------------------------------|----------------|----------|---------------|-----------------|------------|------|------|------|-----|-------|
| NMV P340566 | GSC26406-SL017 | Grinnell Peninsula, Devon Island | Assistance Fm. | GSC26406 | Ventral valve | Originall shell | Fig. 28Q-S | 37.7 | 37.7 | 21.7 | 8.5 | 1.737 |
| NMV P340567 | GSC26406-SL018 | Grinnell Peninsula, Devon Island | Assistance Fm. | GSC26406 | Ventral valve | Originall shell | Fig. 28T-V | 40.7 | 45.0 | 19.1 | 7.6 | 2.356 |
| NMV P340568 | GSC26406-SL019 | Grinnell Peninsula, Devon Island | Assistance Fm. | GSC26406 | Ventral valve | Originall shell |            | 32.3 | 35.0 | 19.9 | 8.1 | 1.759 |
| NMV P340569 | GSC26406-SL020 | Grinnell Peninsula, Devon Island | Assistance Fm. | GSC26406 | Ventral valve | Originall shell |            | 35.4 | 38.5 | 21.7 | 7.9 | 1.774 |

  
dorsal valve
